# Supplementary material for: Mucin-1 Protein Is a Prognostic Marker for Pancreatic Ductal Adenocarcinoma: Results From the CONKO-001 Study
Source: PubMed Central journal article supplement (PMC8354141; doi:10.3389/fonc.2021.670396), 2021-07-27
Supplement: DataSheet_1.pdf [file DataSheet_1.pdf]

**A.**

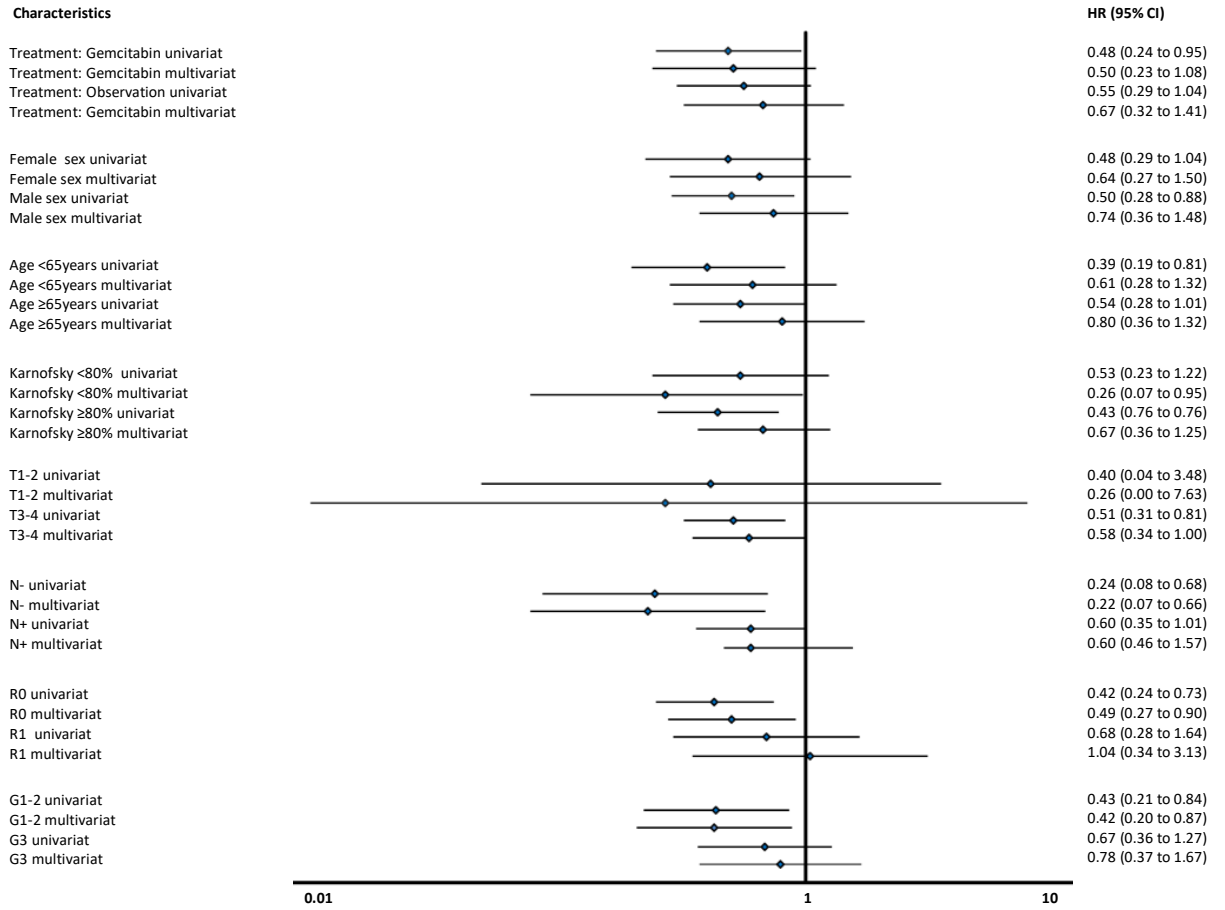

**B.**

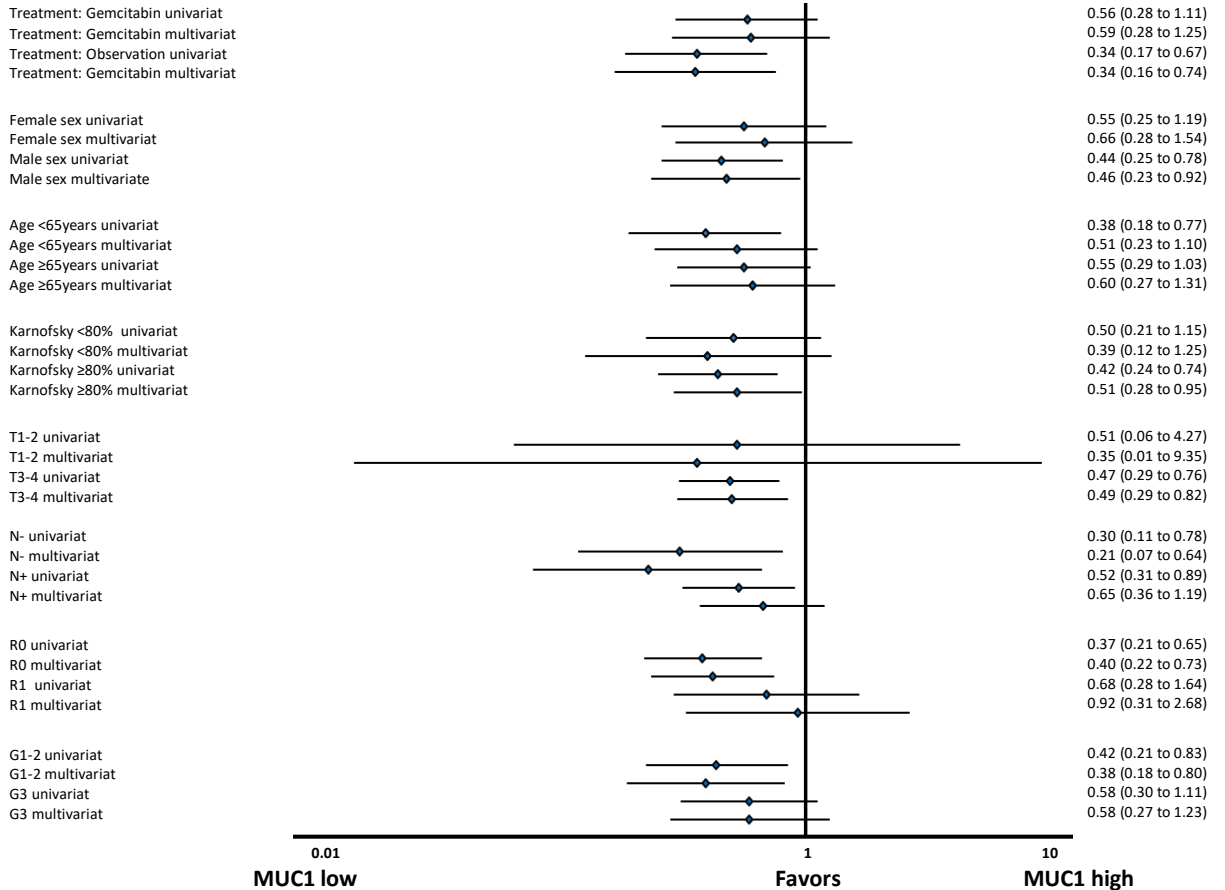

**Supplementary Figure 1: Survival analyses in subgroups for (A) disease free survival and (B) overall survival**

Efficacy analyses in subgroups for (A) disease free survival and (B) overall survival. Forest plots with indicated analyses: (A) hazard ratios (HRs) for progression or death with 95% CIs, and (B) HRs for death with 95% CIs. Karnofsky, Karnofsky performance Status Scale; T1-2, T1-2 stage; T3-4; T3-4 stage; N-, nodal negative stage; N+ nodal positive stage; R0, R0 resection stage; R1, R1 resection stage.
